# Supplementary material for: High-intensity Interval Training Enhances Hypoxia-mediated Right Cardiac Mechanics in Sedentary Men
Source: Research Square preprint supplement (doi:10.21203/rs.3.rs-109240/v1), 2020-11-24
Supplement: Supplementary file 1 [file 9584023e778ba429001eb88f.docx]

**Supplementary Data**

**High-Intensity Interval Training Enhances Hypoxia-Mediated Right Cardiac Mechanics in Sedentary Men**

Yu-Chieh Huang, PhD1; Chih-Chin Hsu, MD, PhD2; Tieh-Cheng Fu, MD, PhD2; Jong-Shyan Wang, PhD2,3,4*

1 Department of Physical Therapy, College of Medical and Health Science, Asia University, Taichung, Taiwan

2 Heart Failure Center, Department of Physical Medicine and Rehabilitation, Keelung Chang Gung Memorial Hospital, Keelung, Taiwan

3 Healthy Aging Research Center, Graduate Institute of Rehabilitation Science, Medical Collage, Chang Gung University, Taoyuan, Taiwan

4 Research Center for Chinese Herbal Medicine, College of Human Ecology, Chang Gung University of Science and Technology, Taoyuan, Taiwan

**Supplementary Table S1**

**Supplementary Figure S1**

**Supplementary Figure S2**

| **Supplementary Table S1: Reliability data of RV strain variables** | | | | | |
| --- | --- | --- | --- | --- | --- |
|  | Intra-observer | | | | |
|  | ICC | 95% CI | CV% | Cronbach Alpha | r |
| RV radial strain, % | 0.89 | 0.74-0.95 | 7.9 (7.6-8.2) | 0.94 | 0.9 |
| RV longitudinal strain, % | 0.93 | 0.83-0.97 | 5.7 (5.2-6.2) | 0.96 | 0.95 |

ICC: intraclass correlation coefficient

CI: Confidence interval

CV%: Coefficient of variation

**Supplementary Figure S1**

**Fig. S1: Test-retest comparisons of** (A) RV radial strain correlation dot plot, (B) RV longitudinal strain correlation dot plot, (C) RV radial strain Bland–Altman plots and (D) RV longitudinal strain Bland–Altman plots for 2D-STE in intra-observer reproducibility. (n=20)

**Supplementary Figure S2**

**Fig. S2:** The picture provides an example of a single screenshot of the echocardiogram in a subject showing landmarks. Quantification of : (A) RV area in end-diastole, (B) RV area in end-systole, (C) RV cavity diameters in end-diastole and (C) RV cavity diameters in end-systole. **RVD1:** basal cavity diameter, **RVD2:** mid cavity diameter, **RVD3:** longitudinal cavity diameter.
